# Supplementary material for: Vertical stratification of Diptera abundance and species richness in an Amazonian tropical forest
Source: Research Square preprint supplement (doi:10.21203/rs.3.rs-430012/v1), 2021-04-22
Supplement: Supplementary file 1 [file 2d7c7ab9909f9bbbbae44331.xlsx]

## Sheet: Plan1
Supplementary Material. Table IV. Number of species of different Diptera guilds at each level of the ZF2 biological reserve tower.
	Number of species	%	0 m	8 m	16 m	24 m	32 m
Unknown biology	116	-	-	-	-	-	-
Parasitoids	207	0.281	31	87	77	53	53
Phytosaprophagous	162	0.22	70	52	46	53	14
Predators	157	0.213	65	54	62	67	43
Fungivorous	114	0.155	83	30	22	23	12
Scavengers	34	0.046	11	8	9	17	10
Kleptoparasites	16	0.022	7	7	7	7	7
Ant and termite nest associates	14	0.019	4	1	3	8	1
Sap flux	13	0.018	5	6	6	2	0
Herbivores	10	0.014	5	1	1	0	0
Coprophagous	9	0.012	5	2	1	1	2
