# Supplementary material for: Vertical stratification of Diptera abundance and species richness in an Amazonian tropical forest
Source: Research Square preprint supplement (doi:10.21203/rs.3.rs-430012/v1), 2021-04-22
Supplement: Supplementary file 2 [file ce76c900e3ff44b54fbb7b8f.xlsx]

## Sheet: General data
Supplementary Material. Table V. Full data on identified species of Diptera in the ZF2 biological reserve tower samples.
			Total abundance
Family	Subfamily	Species	0m	8 m	16 m	24 m	32 m
Limoniidae	Chioneinae	Atarba sp. 1	0	0	0	1	1
Limoniidae	Chioneinae	Atarba sp. 2	0	0	0	1	0
Limoniidae	Chioneinae	Atarba sp. 3	7	0	0	0	0
Limoniidae	Chioneinae	Atarba sp. 4	1	0	2	0	0
Limoniidae	Chioneinae	Atarba sp. 5	0	0	0	1	0
Limoniidae	Chioneinae	Atarba sp. 6	0	0	0	2	0
Limoniidae	Chioneinae	Erioptera (Mesocyphona) sp. 1	19	10	0	9	0
Limoniidae	Chioneinae	Gnophomyia sp. 1	18	1	0	5	3
Limoniidae	Chioneinae	Gnophomyia sp. 2	1	0	0	0	0
Limoniidae	Chioneinae	Gnophomyia sp. 3	3	0	0	0	0
Limoniidae	Chioneinae	Gonomyia sp. 1	0	1	0	1	0
Limoniidae	Chioneinae	Styringomyia sp. 1	1	0	0	0	0
Limoniidae	Chioneinae	Teucholabis (T.) sp. 1	27	0	0	3	0
Limoniidae	Chioneinae	Teucholabis (T.) sp. 2	9	2	0	0	0
Limoniidae	Chioneinae	Teucholabis (T.) sp. 3	1	1	1	5	1
Limoniidae	Chioneinae	Teucholabis (T.) sp. 4	5	2	0	1	0
Limoniidae	Chioneinae	Teucholabis (T.) sp. 5	0	2	0	10	3
Limoniidae	Chioneinae	Teucholabis (T.) sp. 6	0	0	0	1	0
Limoniidae	Chioneinae	Teucholabis (T.) sp. 7	1	0	0	0	0
Limoniidae	Chioneinae	Teucholabis (T.) sp. 8	1	0	2	9	0
Limoniidae	Chioneinae	Teucholabis (T.) sp. 9	0	0	0	9	1
Limoniidae	Chioneinae	Teucholabis (T.) sp. 10	2	0	0	1	0
Limoniidae	Chioneinae	Teucholabis (T.) sp. 11	2	0	0	0	0
Limoniidae	Chioneinae	Teucholabis (T.) sp. 12	1	0	0	0	0
Limoniidae	Chioneinae	Teucholabis (T.) sp. 13	47	0	0	0	0
Limoniidae	Chioneinae	Teucholabis (T.) sp. 14	0	0	0	1	0
Limoniidae	Chioneinae	Teucholabis (T.) sp. 15	1	0	0	0	0
Limoniidae	Chioneinae	Teucholabis (T.) sp. 16	33	0	1	0	0
Limoniidae	Chioneinae	Teucholabis (T.) sp. 17	0	0	1	0	0
Limoniidae	Chioneinae	Teucholabis (T.) sp. 18	23	0	0	0	0
Limoniidae	Limnophilinae	Hexatoma sp. 1	1	1	0	0	0
Limoniidae	Limnophilinae	Polymera sp. 1	0	2	0	0	0
Limoniidae	Limnophilinae	Polymera sp. 2	0	0	0	1	0
Limoniidae	Limnophilinae	Polymera sp. 3	1	0	0	0	0
Limoniidae	Limoniinae	Dicranomyia sp. 1	2	0	0	0	0
Limoniidae	Limoniinae	Dicranomyia sp. 2	2	0	0	0	0
Limoniidae	Limoniinae	Dicranomyia sp. 3	3	0	0	0	0
Limoniidae	Limoniinae	Dicranomyia sp. 4	2	0	0	0	0
Limoniidae	Limoniinae	Dicranomyia sp. 5	13	0	0	0	0
Limoniidae	Limoniinae	Dicranomyia sp. 6	0	1	0	0	0
Limoniidae	Limoniinae	Dicranomyia sp. 7	0	1	0	0	0
Limoniidae	Limoniinae	Dicranomyia sp. 8	0	22	38	81	92
Limoniidae	Limoniinae	Dicranomyia sp. 9	0	0	0	1	0
Limoniidae	Limoniinae	Elephantomyia sp. 1	1	0	0	0	0
Limoniidae	Limoniinae	Geranomyia sp. 1	2	2	1	0	0
Limoniidae	Limoniinae	Geranomyia sp. 2	0	0	1	0	0
Limoniidae	Limoniinae	Geranomyia sp. 3	0	0	0	0	1
Limoniidae	Limoniinae	Helius sp. 1	3	0	6	7	0
Limoniidae	Limoniinae	Helius sp. 2	2	5	2	0	0
Limoniidae	Limoniinae	Helius sp. 3	3	0	0	0	0
Limoniidae	Limoniinae	Helius sp. 4	0	1	0	0	0
Limoniidae	Limoniinae	Rhipidia sp. 1	0	0	0	0	1
Limoniidae	Limoniinae	Toxorhina sp. 1	1	0	0	0	0
Limoniidae	Limoniinae	Toxorhina sp. 2	0	0	2	1	0
Limoniidae	Limoniinae	Toxorhina sp. 3	0	0	0	1	0
Limoniidae	Limoniinae	Toxorhina sp. 4	0	5	0	0	0
Limoniidae	Limoniinae	Toxorhina sp. 5	0	2	0	0	0
Limoniidae	-	INDET sp. 1	0	0	1	0	0
Limoniidae	-	INDET sp. 2	0	0	0	1	0
Limoniidae	-	INDET sp. 3	0	0	0	0	2
Tipulidae	Tipulinae	Brachypremna sp. 1	2	1	1	1	0
Tipulidae	Tipulinae	Leptotarsus sp. 1	2	0	0	0	0
Tipulidae	Tipulinae	Leptotarsus sp. 2	46	8	0	0	0
Tipulidae	Tipulinae	Leptotarsus sp. 3	1	0	0	0	0
Tipulidae	Tipulinae	Leptotarsus sp. 4	1	0	0	0	0
Tipulidae	Tipulinae	Leptotarsus sp. 5	0	0	0	0	1
Tipulidae	Tipulinae	Tipula sp. 1	0	1	0	0	0
Tipulidae	Tipulinae	Tipula sp. 2	0	0	0	1	0
Tipulidae	Tipulinae	Tipula (Eumicrotipula) sp. 1	1	1	1	5	2
Tipulidae	Tipulinae	Tipula (Microtipula) sp. 1	25	0	0	0	0
Tipulidae	Tipulinae	Tipula (Microtipula) sp. 2	0	0	0	0	1
Tipulidae	Tipulinae	Tipula (Microtipula) sp. 3	0	0	6	0	0
Tipulidae	Tipulinae	Tipula (Microtipula) sp. 4	0	0	0	0	2
Tipulidae	Tipulinae	Tipula (Microtipula) sp. 5	0	6	0	6	2
Tipulidae	Tipulinae	Tipula (Microtipula) sp. 6	1	0	0	0	0
Tipulidae	Tipulinae	Tipula (Microtipula) sp. 7	0	0	0	1	0
Tipulidae	Tipulinae	Tipula (Microtipula) sp. 8	1	0	0	0	0
Tipulidae	Tipulinae	Zelandotipula sp. 1	2	0	0	0	0
Anisopodidae	Olbiogastrinae	Olbiogaster sp. 1	0	2	2	0	0
Anisopodidae	Olbiogastrinae	Olbiogaster sp. 2	0	2	2	3	0
Anisopodidae	Olbiogastrinae	Olbiogaster sp. 3	0	1	2	0	0
Anisopodidae	Olbiogastrinae	Olbiogaster sp. 4	0	1	0	0	0
Anisopodidae	Olbiogastrinae	Olbiogaster sp. 5	0	1	0	0	0
Bibionidae	Pleciinae	Plecia sp. 1	9	0	0	0	0
Bibionidae	Pleciinae	Plecia sp. 2	0	0	2	0	0
Diadocidiidae		Diadocidia sp. 1	1	0	0	0	0
Ditomyiidae		Melosymmerus sp. 1	1	0	0	0	0
Lygistorrhinidae		Lygistorrhina sp. 1	0	2	0	0	0
Lygistorrhinidae		Lygistorrhina sp. 2	6	2	0	0	0
Lygistorrhinidae		Lygistorrhina sp. 3	0	4	0	0	0
Lygistorrhinidae		Lygistorrhina sp. 4	0	0	1	0	0
Mycetophilidae	Sciophilinae	Cluzobra sp. 1	0	0	0	1	0
Mycetophilidae	Sciophilinae	Cluzobra sp. 2	26	19	8	1	0
Mycetophilidae	Sciophilinae	Cluzobra sp. 3	0	2	1	0	0
Mycetophilidae	Sciophilinae	Cluzobra sp. 4	1	1	1	0	0
Mycetophilidae	Sciophilinae	Cluzobra variegata Matile	0	2	1	0	0
Mycetophilidae	Sciophilinae	Cluzobra sp. 6	0	0	1	0	0
Mycetophilidae	Sciophilinae	Cluzobra sp. 7	22	1	0	0	0
Mycetophilidae	Sciophilinae	Cluzobra sp. 8	20	0	0	0	0
Mycetophilidae	Sciophilinae	Cluzobra unident. Females	12	7	9	0	0
Mycetophilidae	Sciophilinae	Monoclona sp. 1	1	1	0	0	0
Mycetophilidae	Sciophilinae	Monoclona sp. 2	0	1	0	0	0
Mycetophilidae	Sciophilinae	Monoclona sp. 3	2	0	0	0	0
Mycetophilidae	Gnoristinae	Dziedzickia sp. 1	11	0	0	0	0
Mycetophilidae	Gnoristinae	Dziedzickia sp. 2	3	0	0	0	0
Mycetophilidae	Gnoristinae	Dziedzickia sp. 3	1	0	0	0	0
Mycetophilidae	Gnoristinae	Dziedzickia sp. 4	1	0	0	0	0
Mycetophilidae	Gnoristinae	Dziedzickia sp. 5	1	0	0	0	0
Mycetophilidae	Gnoristinae	Schnusea sp. 1	1	0	0	0	0
Mycetophilidae	Gnoristinae	Schnusea sp. 2	2	0	0	0	0
Mycetophilidae	Gnoristinae	Schnusea sp. 3	18	0	0	0	0
Mycetophilidae	Gnoristinae	Synapha sp. 1	6	2	1	0	7
Mycetophilidae	Gnoristinae	Synapha sp. 2	0	0	0	0	7
Mycetophilidae	Gnoristinae	Synapha sp. 3	1	0	0	0	0
Mycetophilidae	Gnoristinae	Synapha sp. 4	1	0	0	0	0
Mycetophilidae	Gnoristinae	Synapha sp. 5	1	0	0	0	0
Mycetophilidae	Gnoristinae	Genus E sp. 1	1	0	0	0	0
Mycetophilidae	Leiinae	Aphrastomyia cerquerai Lane	1	0	1	0	0
Mycetophilidae	Leiinae	Aphrastomyia sp. 2	3	0	0	0	0
Mycetophilidae	Leiinae	Aphrastomyia sp. 3	2	0	0	0	0
Mycetophilidae	Leiinae	Leia sp. 1	28	7	3	8	24
Mycetophilidae	Leiinae	Leia sp. 2	15	1	4	14	11
Mycetophilidae	Leiinae	Leia sp. 3	22	0	1	15	3
Mycetophilidae	Leiinae	Leia sp. 4	0	0	0	1	0
Mycetophilidae	Leiinae	Leia sp. 5	0	0	1	0	0
Mycetophilidae	Leiinae	Leiella unicincta Edwards	0	0	0	1	1
Mycetophilidae	Leiinae	Leiella zonalis Edwards	0	3	0	5	0
Mycetophilidae	Leiinae	Leiella sp. 3	1	0	0	0	0
Mycetophilidae	Leiinae	Leiella sp. 4	2	0	0	0	0
Mycetophilidae	Leiinae	Manota spp.	155	9	1	0	1
Mycetophilidae	Tetragoneurinae	Tetragoneura sp. 1	2	3	0	0	0
Mycetophilidae	Tetragoneurinae	Tetragoneura sp. 2	2	4	0	0	0
Mycetophilidae	Tetragoneurinae	Tetragoneura sp. 3	2	1	0	0	0
Mycetophilidae	Tetragoneurinae	Tetragoneura sp. 4	5	1	0	0	0
Mycetophilidae	Mycomyinae	Mycomya sp. 1	0	1	1	1	1
Mycetophilidae	Mycomyinae	Mycomya sp. 2	0	1	0	0	0
Mycetophilidae	Mycomyinae	Neoempheria sp. 1	0	0	2	1	0
Mycetophilidae	Mycomyinae	Neoempheria sp. 2	0	0	0	1	0
Mycetophilidae	Mycomyinae	Neoempheria sp. 3	0	0	0	3	0
Mycetophilidae	Mycomyinae	Neoempheria sp. 4	1	0	0	1	0
Mycetophilidae	Mycomyinae	Neoempheria sp. 5	1	0	0	0	0
Mycetophilidae	Mycomyinae	Neoempheria sp. 6	1	0	0	0	0
Mycetophilidae	Mycomyinae	Neoempheria sp. 7	1	0	0	0	0
Mycetophilidae	Mycomyinae	Neoempheria sp. 8	2	0	0	0	0
Mycetophilidae	Mycomyinae	Neoempheria sp. 9	1	0	0	0	0
Mycetophilidae	Mycomyinae	Neoempheria sp. 10	1	0	0	0	0
Mycetophilidae	Mycomyinae	Neoempheria sp. 11	1	0	0	0	0
Mycetophilidae	Mycomyinae	Neoempheria sp. 12	1	0	0	0	0
Mycetophilidae	Mycomyinae	Neoempheria sp. 13	1	0	0	0	0
Mycetophilidae	Mycomyinae	Neoempheria sp. 14	1	0	0	0	0
Mycetophilidae	Mycomyinae	Neoempheria sp. 15	1	0	0	0	0
Mycetophilidae	Mycomyinae	Neoempheria sp. 16	3	0	0	0	0
Mycetophilidae	Mycomyinae	Neoempheria sp. 17	1	0	0	0	0
Mycetophilidae	Mycomyinae	Neoempheria sp. 18	2	0	0	0	0
Mycetophilidae	Mycomyinae	Neoempheria sp. 19	1	0	0	0	0
Mycetophilidae	Mycomyinae	Neoempheria sp. 20	1	0	0	0	0
Mycetophilidae	Mycomyinae	Neoempheria sp. 21	1	0	0	0	0
Mycetophilidae	Mycetophilinae	Epicypta sp. 1	4	1	0	1	2
Mycetophilidae	Mycetophilinae	Epicypta sp. 2	1	0	0	1	0
Mycetophilidae	Mycetophilinae	Epicypta sp. 3	0	0	0	1	0
Mycetophilidae	Mycetophilinae	Epicypta sp. 4	0	0	0	1	0
Mycetophilidae	Mycetophilinae	Epicypta sp. 5	2	0	0	1	0
Mycetophilidae	Mycetophilinae	Epicypta sp. 6	30	1	2	2	0
Mycetophilidae	Mycetophilinae	Epicypta sp. 7	4	0	0	1	0
Mycetophilidae	Mycetophilinae	Epicypta sp. 8	2	2	0	0	1
Mycetophilidae	Mycetophilinae	Epicypta sp. 9	2	0	1	0	0
Mycetophilidae	Mycetophilinae	Epicypta sp. 10	4	0	2	0	0
Mycetophilidae	Mycetophilinae	Epicypta sp. 11	0	0	1	0	0
Mycetophilidae	Mycetophilinae	Epicypta sp. 12	5	0	1	0	0
Mycetophilidae	Mycetophilinae	Epicypta sp. 13	0	0	0	0	0
Mycetophilidae	Mycetophilinae	Epicypta sp. 14	3	2	2	0	0
Mycetophilidae	Mycetophilinae	Epicypta sp. 15	0	1	0	0	0
Mycetophilidae	Mycetophilinae	Epicypta sp. 16	0	1	0	0	0
Mycetophilidae	Mycetophilinae	Epicypta sp. 17	48	2	1	0	0
Mycetophilidae	Mycetophilinae	Epicypta sp. 18	10	1	0	0	0
Mycetophilidae	Mycetophilinae	Epicypta sp. 19	1	0	0	0	0
Mycetophilidae	Mycetophilinae	Epicypta sp. 20	1	0	0	0	0
Mycetophilidae	Mycetophilinae	Epicypta sp. 21	2	0	0	0	0
Mycetophilidae	Mycetophilinae	Epicypta sp. 22	3	0	0	0	0
Mycetophilidae	Mycetophilinae	Epicypta sp. 23	1	0	0	0	0
Mycetophilidae	Mycetophilinae	Epicypta sp. 24	1	0	0	0	0
Mycetophilidae	Mycetophilinae	Epicypta sp. 25	1	0	0	0	0
Mycetophilidae	Mycetophilinae	Epicypta sp. 26	1	0	0	0	0
Mycetophilidae	Mycetophilinae	Epicypta sp. 27	2	0	0	0	0
Mycetophilidae	Mycetophilinae	Epicypta sp. 28	1	0	0	0	0
Mycetophilidae	Mycetophilinae	Epicypta sp. 29	1	0	0	0	0
Mycetophilidae	Mycetophilinae	Epicypta unident. females	18	0	0	0	0
Mycetophilidae	Mycetophilinae	Exechiopsis sp. 2	1	0	0	0	0
Mycetophilidae	Mycetophilinae	Mycetophila sp. 2	1	0	0	0	0
Mycetophilidae	Mycetophilinae	Neallodia sp. 1	1	0	0	0	0
Mycetophilidae	Mycetophilinae	Neallodia sp. 2	1	0	0	0	0
Mycetophilidae	Mycetophilinae	Rymosia damascenoi Lane	1	0	0	0	0
Mycetophilidae	Mycetophilinae	Zygomyia sp. 1	4	0	0	0	0
Mycetophilidae	Mycetophilinae	Zygomyia sp. 2	3	0	0	0	0
Scatopsidae	Scatopsinae	Neorhegmoclemina sp. 1	1	2	0	1	0
Scatopsidae	Scatopsinae	Neorhegmoclemina sp. 2	0	1	0	0	0
Scatopsidae	Scatopsinae	Neorhegmoclemina? sp. 1	0	1	0	0	0
Scatopsidae	Scatopsinae	Thripomorpha sp. 1	2	0	0	0	0
Scatopsidae	Scatopsinae	Brahemyia sp. 1	1	1	1	0	0
Scatopsidae	Scatopsinae	Brahemyia sp. 2	1	0	0	0	0
Scatopsidae	Scatopsinae	Aztecatopse sp. 1	0	1	0	0	0
Rhagionidae	Chrysopilinae	Chrysopilus sp. 1	1	0	0	0	0
Rhagionidae	Chrysopilinae	Chrysopilus sp. 2	1	0	0	0	0
Rhagionidae	Chrysopilinae	Chrysopilus sp. 3	0	0	0	1	0
Tabanidae	Pangoniinae	Fidena pseudoaurimaculata	1	2	1	1	1
Tabanidae	Chrysopsinae	Chrysops variegatus	0	2	0	1	0
Tabanidae	Chrysopsinae	Chrysops cf incisus	0	0	0	1	0
Tabanidae	Tabaninae	Stypommisa glandicolor	39	2	0	1	0
Tabanidae	Tabaninae	Catachlorops rubiginosus	1	0	0	0	0
Tabanidae	Tabaninae	Leucotabanus exaestuan	1	0	0	0	0
Tabanidae	Tabaninae	Dichelacera cervicornis	1	0	0	0	0
Tabanidae	Tabaninae	Tabanus cf trivittatus	4	1	0	0	0
Tabanidae	Tabaninae	Tabanus antarcticus	1	0	0	0	0
Tabanidae	Tabaninae	Tabanus cf occidentalis	1	0	0	0	0
Tabanidae	Tabaninae	Tabanus nematocallus	4	0	0	0	0
Tabanidae	Tabaninae	Tabanus sp1	3	0	0	0	0
Tabanidae	Tabaninae	Tabanus fortis	1	1	0	0	0
Tabanidae	Tabaninae	Chlorotabanus inanis	1	1	1	0	0
Tabanidae	Tabaninae	Stibasoma currani	0	1	0	0	1
Tabanidae	Tabaninae	Acanthocera gorayebi	0	3	3	0	0
Tabanidae	Tabaninae	Acanthocera marginalis	0	1	0	0	0
Tabanidae	Tabaninae	Diachlorus xynus	0	5	4	0	1
Tabanidae	Tabaninae	Philipotabanus stigmaticalis	0	0	0	1	1
Stratiomyidae	Beridinae	Arcuavena sp. 1	1	0	0	0	0
Stratiomyidae	Beridinae	Oplacantha sp. 1	0	1	1	0	0
Stratiomyidae	Clitellariinae	Cyphomyia unicolor	2	0	0	0	0
Stratiomyidae	Clitellariinae	Cyphomyia sp. 1	0	0	0	1	0
Stratiomyidae	Clitellariinae	Cyphomyia sp. 2	0	1	0	0	0
Stratiomyidae	Clitellariinae	Cyphomyia sp. 3	1	0	0	0	0
Stratiomyidae	Clitellariinae	Diaphorostylus sp. 1	1	0	0	0	0
Stratiomyidae	Clitellariinae	Euryneura sp. 1	0	0	1	0	0
Stratiomyidae	Clitellariinae	Euryneura sp. 2	1	0	1	0	0
Stratiomyidae	Hermetiinae	Hermetia flavipes	0	0	2	0	0
Stratiomyidae	Hermetiinae	Hermetia illucens	0	0	0	1	0
Stratiomyidae	Hermetiinae	Hermetia pulchra	0	2	0	0	0
Stratiomyidae	Pachygastrinae	Artemita sp. 1	0	0	0	0	1
Stratiomyidae	Pachygastrinae	Brachyodina dorsata	1	2	0	0	0
Stratiomyidae	Pachygastrinae	Cyclotaspis sp. 1	2	0	0	0	0
Stratiomyidae	Pachygastrinae	Eidalimus sp. 1	4	0	0	0	0
Stratiomyidae	Pachygastrinae	Eidalimus sp. 2	3	0	0	0	0
Stratiomyidae	Pachygastrinae	Gowdeyana sp. 1	0	0	1	0	0
Stratiomyidae	Pachygastrinae	Lyprotemyia [or Pachygaster] sp. 1	0	0	2	0	0
Stratiomyidae	Pachygastrinae	Manotes sp. 1	0	0	1	0	0
Stratiomyidae	Pachygastrinae	Proegmenomyia metallica	1	0	0	0	0
Stratiomyidae	Sarginae	Merosargus gracilis	13	0	0	0	0
Stratiomyidae	Sarginae	Merosargus incanus	1	0	0	0	0
Stratiomyidae	Sarginae	Merosargus nebulifer	1	1	0	0	0
Stratiomyidae	Sarginae	Merosargus pictipes	8	0	1	0	0
Stratiomyidae	Sarginae	Merosargus stamineus	1	3	0	0	0
Stratiomyidae	Sarginae	Merosargus tripartitus	1	0	0	0	0
Stratiomyidae	Sarginae	Merosargus sp. 1	0	0	1	0	0
Stratiomyidae	Sarginae	Ptecticus sp. 1	1	0	0	0	0
Stratiomyidae	Sarginae	Sargus brasiliensis	0	5	0	0	0
Stratiomyidae	Sarginae	Sargus fasciatus	5	0	0	0	0
Stratiomyidae	Sarginae	Sargus sp. 1	1	0	0	0	0
Therevidae	-	Ataenogera brevicornis	0	0	0	5	0
Bombyliidae	Anthracinae	Exoprosopa sp. 1	0	1	0	1	0
Empididae	Empidinae	Empis sp. 1	6	8	13	63	7
Empididae	Empidinae	Empis sp. 2	1	0	0	0	0
Empididae	Empidinae	Empis sp. 3	0	0	0	1	0
Empididae	Empidinae	Macrostomus albicaudatus	20	5	0	0	0
Empididae	Empidinae	Macrostomus cervicicauda	2	0	3	4	0
Empididae	Empidinae	Macrostomus manauara	2	4	0	0	0
Empididae	Empidinae	Macrostomus sp. 1	4	0	0	0	0
Empididae	Empidinae	Macrostomus sp. 2	3	0	0	3	0
Empididae	Empidinae	Macrostomus sp. 3	0	1	0	0	0
Empididae	Empidinae	Macrostomus ferrugineus	1	0	0	0	0
Empididae	Empidinae	Macrostomus flavus	1	1	0	0	0
Empididae	Empidinae	Macrostomus cysticercus	3	0	0	0	0
Empididae	Empidinae	Porphyrochroa sp. 1	1	2	1	4	0
Empididae	Empidinae	Porphyrochroa sp. 2	9	4	5	0	0
Empididae	Empidinae	Porphyrochroa sp. 3	0	2	0	0	0
Empididae	Empidinae	Porphyrochroa sp. 4	0	0	1	0	0
Empididae	Empidinae	Lamprempis sp. 1	0	1	0	0	0
Empididae	Empidinae	Lamprempis sp. 2	2	0	0	0	0
Empididae	Empidinae	Lamprempis sp. 3	0	0	0	1	1
Empididae	Empidinae	Lamprempis sp. 4	1	0	0	0	0
Empididae	Empidinae	Opeatocerata sp. 1	0	1	0	0	0
Empididae	Empidinae	Opeatocerata sp. 2	0	1	0	0	0
Empididae	Empidinae	Hilara sp. 1	1	0	0	0	0
Empididae	Gen. nov. A	Gen. nov. A sp. 1	0	0	6	3	1
Dolichopodidae	Achalcinae	Xanthina sp. 1	3	0	0	0	0
Dolichopodidae	Achalcinae	Xanthina sp. 2	1	1	3	0	0
Dolichopodidae	Achalcinae	Xanthina sp. 3	0	1	0	0	0
Dolichopodidae	Achalcinae	Xanthina sp. f#	4	1	2	0	0
Dolichopodidae	Diaphorinae	Chrysotus sp. 1	78	1	16	9	30
Dolichopodidae	Diaphorinae	Chrysotus sp. 2	17	5	3	11	1
Dolichopodidae	Diaphorinae	Chrysotus sp. 3	1	0	1	3	0
Dolichopodidae	Diaphorinae	Chrysotus sp. 4	6	5	8	21	21
Dolichopodidae	Diaphorinae	Chrysotus sp. 5	0	0	1	1	3
Dolichopodidae	Diaphorinae	Chrysotus sp. 6	1	1	1	8	0
Dolichopodidae	Diaphorinae	Chrysotus sp. 7	1	0	0	0	0
Dolichopodidae	Diaphorinae	Chrysotus sp. 8	0	0	0	2	0
Dolichopodidae	Diaphorinae	Chrysotus sp. 9	0	0	0	4	0
Dolichopodidae	Diaphorinae	Chrysotus sp. 10	1	0	3	5	0
Dolichopodidae	Diaphorinae	Chrysotus sp. 11	0	0	1	3	4
Dolichopodidae	Diaphorinae	Chrysotus sp. 12	1	0	6	51	8
Dolichopodidae	Diaphorinae	Chrysotus sp. 13	1	0	1	0	0
Dolichopodidae	Diaphorinae	Chrysotus sp. 14	2	0	1	11	2
Dolichopodidae	Diaphorinae	Chrysotus sp. 15	0	0	1	0	0
Dolichopodidae	Diaphorinae	Chrysotus spp. 12-15 f#	4	0	6	63	2
Dolichopodidae	Diaphorinae	Chrysotus spp. f#	0	1	0	1	1
Dolichopodidae	Diaphorinae	Diaphorus sp. 1	0	0	0	0	1
Dolichopodidae	Diaphorinae	Lyroneurus sp. 1	0	0	0	0	6
Dolichopodidae	Diaphorinae	Lyroneurus sp. 2	0	0	9	50	19
Dolichopodidae	Dolichopodinae	Paraclius sp. 1	3	5	4	2	1
Dolichopodidae	Dolichopodinae	Paraclius sp. 2	2	3	2	0	0
Dolichopodidae	Dolichopodinae	Paraclius sp. 3	0	0	1	0	0
Dolichopodidae	Dolichopodinae	Paraclius sp. 4	0	0	0	1	0
Dolichopodidae	Medeterinae	Dominicomyia sp. 1	0	2	9	7	1
Dolichopodidae	Medeterinae	Dominicomyia sp. 2	0	13	1	0	1
Dolichopodidae	Medeterinae	Dominicomyia sp. 3	0	0	0	3	0
Dolichopodidae	Medeterinae	Medetera sp. 1	3	1	2	0	4
Dolichopodidae	Medeterinae	Medetera sp. 2	3	0	2	0	0
Dolichopodidae	Medeterinae	Medetera sp. 3	0	0	6	0	1
Dolichopodidae	Medeterinae	Medetera sp. 4	2	0	2	1	0
Dolichopodidae	Medeterinae	Medetera sp. 5	0	3	5	7	1
Dolichopodidae	Medeterinae	Medetera sp. 6	0	2	1	0	0
Dolichopodidae	Medeterinae	Medetera sp. 7	0	0	2	1	0
Dolichopodidae	Medeterinae	Medetera sp. 8	0	0	1	0	0
Dolichopodidae	Medeterinae	Medetera sp. 9	0	0	1	0	0
Dolichopodidae	Medeterinae	Medetera sp. 10	0	0	1	0	0
Dolichopodidae	Medeterinae	Medetera sp. 11	0	0	0	1	0
Dolichopodidae	Medeterinae	Medetera sp. 12	0	0	0	1	0
Dolichopodidae	Medeterinae	Medetera sp. 13	0	0	0	3	0
Dolichopodidae	Medeterinae	Medetera spp. f#	1	0	0	4	0
Dolichopodidae	Medeterinae	Micromedetera? sp. 1	3	6	0	16	1
Dolichopodidae	Medeterinae	Thrypticus sp. 1	0	0	0	0	1
Dolichopodidae	Medeterinae	Systenus sp. 1	0	0	1	1	0
Dolichopodidae	Medeterinae	Systenus sp. 2	0	0	0	2	0
Dolichopodidae	Medeterinae	Systenus sp. 3	0	0	1	0	0
Dolichopodidae	Medeterinae	Systenus spp. f#	0	0	2	0	0
Dolichopodidae	Medeterinae	New genus 1 sp. 1	0	1	0	0	0
Dolichopodidae	Neurigoninae	Coeloglutus sp 1.	0	0	0	3	0
Dolichopodidae	Neurigoninae	Dactylomyia sp. 1	0	0	1	0	0
Dolichopodidae	Neurigoninae	Dactylomyia sp. 2	0	0	0	0	1
Dolichopodidae	Neurigoninae	Neurigona sp. 1	1	0	0	0	0
Dolichopodidae	Neurigoninae	Neurigona sp. 2	1	0	0	0	0
Dolichopodidae	Neurigoninae	Neurigona sp. 3	1	0	0	0	0
Dolichopodidae	Neurigoninae	Neurigona spp. f#	1	0	1	0	0
Dolichopodidae	Neurigoninae	Viridigona sp. 1	1	0	0	0	0
Dolichopodidae	Neurigoninae	Viridigona sp. 2	0	1	0	0	0
Dolichopodidae	Neurigoninae	Viridigona sp. 3	0	0	1	0	0
Dolichopodidae	Neurigoninae	Viridigona sp. 4	0	0	1	1	0
Dolichopodidae	Neurigoninae	Viridigona spp. f#	3	0	0	0	0
Dolichopodidae	Sciapodinae	Amblypsilopus sp. 1	0	2	15	11	38
Dolichopodidae	Sciapodinae	Condylostylus sp. 1	8	0	9	1	2
Dolichopodidae	Sciapodinae	Condylostylus sp. 2	1	0	10	4	2
Dolichopodidae	Sciapodinae	Condylostylus sp. 3	5	0	1	0	1
Dolichopodidae	Sciapodinae	Condylostylus sp. 4	3	1	1	1	2
Dolichopodidae	Sciapodinae	Condylostylus sp. 5	0	0	0	1	0
Dolichopodidae	Sciapodinae	Condylostylus spp. f#	2	0	0	0	1
Dolichopodidae	Sciapodinae	Mesorhaga sp. 1	0	0	0	0	1
Dolichopodidae	Sciapodinae	New genus 2 sp. 1	0	1	3	0	0
Dolichopodidae	Sciapodinae	New genus 2 spp. f#	2	2	5	2	0
Dolichopodidae	Sympycninae	Sympycnus sp. 1	0	5	0	0	0
Dolichopodidae	incertae sedis	Somillus sp. 1	3	0	0	0	0
Dolichopodidae	incertae sedis	Symbolia sp. 1	7	1	6	0	4
Dolichopodidae	incertae sedis	Symbolia sp. 2	2	2	16	1	3
Dolichopodidae	incertae sedis	Symbolia sp. 3	1	0	0	0	0
Dolichopodidae	incertae sedis	Symbolia sp. 4	0	0	0	0	1
Dolichopodidae	incertae sedis	Symbolia spp. f#	3	8	15	1	1
Platypezidae	Microsaniinae	Microsania sp. 1	0	0	0	2	0
Phoridae	Chonocephalinae	Chonocephalus	4	1	0	0	0
Phoridae	Phorinae	Conicera	1	0	0	0	0
Phoridae	Phorinae	Coniceromyia	9	92	2	2	0
Phoridae	Phorinae	Dohrniphora	37	6	0	8	45
Phoridae	Phorinae	Neopleurophora	1	0	0	0	0
Phoridae	Phorinae	Chaetocnemistoptera	3	0	0	0	0
Phoridae	Metopininae	Acanthophorides	0	0	0	0	1
Phoridae	Metopininae	Allochaeta	0	20	27	49	2
Phoridae	Metopininae	Apocephalus	609	69	8	20	5
Phoridae	Metopininae	Apodicrania	4	15	40	140	48
Phoridae	Metopininae	Auxanommatidia	0	0	0	2	0
Phoridae	Metopininae	Beckerina	1	1	0	0	0
Phoridae	Metopininae	Calamiscus	0	6	0	0	0
Phoridae	Metopininae	Ceratoconus	0	0	0	2	0
Phoridae	Metopininae	Chaetaspidia	0	1	0	0	0
Phoridae	Metopininae	Cremersia	1	0	0	0	0
Phoridae	Metopininae	Dacnophora	3	0	0	1	0
Phoridae	Metopininae	Diocophora	0	9	20	64	13
Phoridae	Metopininae	Eibesfeldtphora	1	2	0	0	0
Phoridae	Metopininae	Gymnophora	2	0	0	0	0
Phoridae	Metopininae	Megaselia	1013	388	52	242	80
Phoridae	Metopininae	Melaloncha	0	3	1	0	0
Phoridae	Metopininae	Metopina-group genera	287	27	2	33	2
Phoridae	Metopininae	Myrmosicarius	1	1	0	0	0
Phoridae	Metopininae	New genus 1	0	12	0	12	1
Phoridae	Metopininae	New genus 2	0	1	0	0	0
Phoridae	Metopininae	New genus 3	0	0	1	0	0
Phoridae	Metopininae	New genus 4	0	0	0	1	0
Phoridae	Metopininae	New genus 5	0	0	1	0	0
Phoridae	Metopininae	New genus 6	0	0	0	0	1
Phoridae	Metopininae	New genus 7	0	0	1	0	0
Phoridae	Metopininae	New genus 8	0	0	0	1	0
Phoridae	Metopininae	New genus 9	0	0	0	0	4
Phoridae	Metopininae	New genus 10	0	12	1	12	0
Phoridae	Metopininae	Phalacrotophora	0	1	1	0	0
Phoridae	Metopininae	Phymatopterella	4	1	0	0	0
Phoridae	Metopininae	Physoptera	0	1	1	0	1
Phoridae	Metopininae	Platydipteron	0	1	3	9	1
Phoridae	Metopininae	Pseudacteon	6	36	11	61	27
Phoridae	Metopininae	Pseudohypocera	0	0	2	1	7
Phoridae	Metopininae	Rhynchophoromyia	2	5	0	1	0
Phoridae	Metopininae	Styletta	0	1	0	0	0
Phoridae	Metopininae	Syneura	0	0	1	9	0
Phoridae	Metopininae	Tabelliphora	0	1	2	52	0
Phoridae	Metopininae	Woodiphora	0	2	0	0	1
Phoridae	Metopininae	Xanionotum	0	0	0	1	0
Pipunculidae		Amazunculus sp. nov.	0	1	0	0	0
Pipunculidae		Basileunculus sp.	0	0	0	1	0
Pipunculidae		Cephalosphaera miriamae	0	1	0	0	0
Pipunculidae		Elmohardyia sp 1	1	0	0	0	0
Pipunculidae		Elmohardyia sp. nov. (sp. 2)	0	0	0	1	0
Pipunculidae		Eudorylas fortis	0	0	1	1	0
Pipunculidae		Eudorylas sp. 1	0	1	0	0	0
Pipunculidae		Eudorylas sp. 2	0	0	1	0	0
Pipunculidae		Eudorylas sp. 3	0	0	1	0	0
Pipunculidae		Eudorylas sp. 4	0	0	0	1	0
Pipunculidae		Eudorylas sp. 5	0	0	0	1	0
Pipunculidae		Gen. nov. 1 sp. n. 1	1	0	0	0	0
Pipunculidae		Gen. nov. 2 sp. n. 1	0	1	0	0	0
Pipunculidae		Gen. nov. 3 sp. n. 1	0	0	0	1	0
Syrphidae	Eristalinae	Alipumilio aff. femoratus	0	1	0	0	0
Syrphidae	Eristalinae	Copestylum sp. 1	0	0	1	1	0
Syrphidae	Eristalinae	Palpada scutellaris	0	1	0	0	0
Syrphidae	Syrphinae	Hybobathus sp.	0	0	1	0	0
Syrphidae	Syrphinae	Fragosa obliquus	0	0	0	1	1
Syrphidae	Syrphinae	Fragosa sp. 1 (rugosifrons species group)	0	2	0	1	0
Syrphidae	Syrphinae	Nuntianus sp. 1	0	0	2	0	0
Syrphidae	Syrphinae	Nuntianus sp. 3	0	0	1	0	0
Syrphidae	Syrphinae	Pelecinobaccha adspersa	0	1	0	2	0
Syrphidae	Microdontinae	Rhopalosyrphus sp. 1	0	1	0	0	0
Syrphidae	Microdontinae	Rhopalosyrphus sp. 2 (sensu lato)	0	0	0	2	0
Syrphidae	Microdontinae	Stipomorpha sp. 1	0	0	1	0	0
Syrphidae	Microdontinae	Stipomorpha sp. 2	0	0	0	1	0
Syrphidae	Microdontinae	Surimyia rolanderi	0	0	3	0	0
Aulacigastridae		Aulacigaster sp. 1	1	0	0	0	0
Chloropidae	Oscinellinae	Conioscinella sp. 1	0	2	0	6	0
Chloropidae	Oscinellinae	Conioscinella sp. 2	0	1	0	1	0
Chloropidae	Oscinellinae	Conioscinella sp. 3	0	7	0	0	0
Chloropidae	Oscinellinae	Conioscinella sp. 4	4	0	0	0	0
Chloropidae	Oscinellinae	Fiebrigella sp. 1	0	0	0	1	0
Chloropidae	Oscinellinae	Fiebrigella sp. 2	0	0	0	1	0
Chloropidae	Oscinellinae	Gaurax ?sp. 2	0	0	0	0	1
Chloropidae	Oscinellinae	Gaurax sp. 1	2	0	0	0	0
Chloropidae	Oscinellinae	Gaurax sp. 2	0	0	1	0	0
Chloropidae	Oscinellinae	Gaurax sp. 3	0	1	0	0	0
Chloropidae	Oscinellinae	Gaurax sp. 4	0	2	0	0	0
Chloropidae	Oscinellinae	?Gaurax sp. 4	0	1	0	0	0
Chloropidae	Oscinellinae	Gaurax sp. 5	0	0	0	2	0
Chloropidae	Oscinellinae	Metasiphonella magnifica	0	0	4	10	0
Chloropidae	Oscinellinae	Notaulacella sp. 1	8	1	0	0	0
Chloropidae	Oscinellinae	Notaulacella sp. 2	2	0	0	0	0
Chloropidae	Oscinellinae	Olcella sp. 1	1	0	0	0	0
Chloropidae	Oscinellinae	Onychaspidium sp.	0	0	1	0	0
Chloropidae	Oscinellinae	Pseudogaurax ?mexoculatus	0	0	1	0	0
Chloropidae	Oscinellinae	Pseudogaurax ?paratolmos	1	0	0	0	0
Chloropidae	Oscinellinae	Pseudogaurax nigrolineatus	0	1	0	0	0
Chloropidae	Oscinellinae	Pseudogaurax nigromaculatus	0	1	0	0	0
Chloropidae	Oscinellinae	Pseudogaurax souzalopesi	0	1	0	0	0
Chloropidae	Oscinellinae	Pseudogaurax sp. 1	1	0	0	0	0
Chloropidae	Oscinellinae	Pseudogaurax trilineatus	0	0	0	1	0
Chloropidae	Oscinellinae	Rhopalopterum sp. 1	2	0	0	0	0
Chloropidae	Oscinellinae	Tricimba sp. 1	1	5	0	0	0
Chloropidae	Oscinellinae	Tricimba sp. 2	0	3	0	0	0
Chloropidae	Oscinellinae	Oscinellinae gen. indet. sp.	0	1	0	0	0
Clusiidae	Sobarocephainae	Sobarocephala sp. 1	0	0	0	1	0
Clusiidae	Sobarocephainae	Sobarocephala sp. 2	0	0	0	1	0
Clusiidae	Sobarocephainae	Sobarocephala sp. 3	0	0	0	0	1
Clusiidae	Sobarocephainae	Sobarocephala sp. 4	2	0	0	0	0
Clusiidae	Sobarocephainae	Sobarocephala sp. 5	0	0	0	1	0
Clusiidae	Sobarocephainae	Sobarocephala sp. 6	0	0	0	1	0
Clusiidae	Sobarocephainae	Sobarocephala sp. 7	0	0	0	1	0
Clusiidae	Sobarocephainae	Sobarocephala sp. 8	0	0	0	2	0
Clusiidae	Sobarocephainae	Sobarocephala sp. 9	0	0	0	1	0
Clusiidae	Sobarocephainae	Sobarocephala sp. 10	0	2	0	0	0
Clusiidae	Sobarocephainae	Sobarocephala sp. 11	0	2	0	0	0
Clusiidae	Sobarocephainae	Sobarocephala sp. 12	0	1	0	0	0
Clusiidae	Sobarocephainae	Sobarocephala sp. 13	0	1	0	0	0
Clusiidae	Sobarocephainae	Sobarocephala sp. 14	0	1	0	0	0
Clusiidae	Sobarocephainae	Sobarocephala sp. 15	0	1	0	0	0
Clusiidae	Sobarocephainae	Sobarocephala sp. 16	0	1	0	0	0
Conopidae	Stylogastrinae	Stylogaster sp. 1	2	0	0	0	0
Conopidae	Stylogastrinae	Stylogaster sp. 2	0	2	0	0	0
Conopidae	Stylogastrinae	Stylogaster sp. 3	0	0	0	2	0
Drosophilidae	Drosophilinae	Chymomyza sp. 1	1	1	0	0	0
Drosophilidae	Drosophilinae	Cladochaeta atlantica	0	1	0	0	0
Drosophilidae	Drosophilinae	Cladochaeta sp. 1	1	0	0	0	0
Drosophilidae	Drosophilinae	Cladochaeta sp. 2	1	0	0	1	0
Drosophilidae	Drosophilinae	Cladochaeta sp. 3	0	1	1	0	0
Drosophilidae	Drosophilinae	Cladochaeta sp. 5	0	0	1	0	0
Drosophilidae	Drosophilinae	Cladochaeta sp. 6	0	0	1	0	0
Drosophilidae	Drosophilinae	Diathoneura tesselata	3	0	0	0	0
Drosophilidae	Drosophilinae	Diathoneura sp. 1	1	0	0	0	0
Drosophilidae	Drosophilinae	Diathoneura sp. 2	1	0	0	0	0
Drosophilidae	Drosophilinae	Diathoneura sp. 3	0	2	1	0	0
Drosophilidae	Drosophilinae	Diathoneura sp. 4	0	1	0	0	0
Drosophilidae	Drosophilinae	Diathoneura sp. 5	0	1	0	0	0
Drosophilidae	Drosophilinae	Diathoneura sp. 6	0	0	0	1	0
Drosophilidae	Drosophilinae	Drosophila aff. busckii	1	0	0	0	0
Drosophilidae	Drosophilinae	Drosophila aff. immigrans	1	1	0	0	0
Drosophilidae	Drosophilinae	Drosophila sp. 1 (tripunctata group)	5	0	0	1	0
Drosophilidae	Drosophilinae	Drosophila sp. 2	2	0	0	0	0
Drosophilidae	Drosophilinae	Drosophila sp. 3	1	0	0	0	0
Drosophilidae	Drosophilinae	Drosophila sp. 4	4	0	0	0	0
Drosophilidae	Drosophilinae	Drosophila sp. 5	0	1	2	7	1
Drosophilidae	Drosophilinae	Drosophila sp. 6	0	0	0	1	0
Drosophilidae	Drosophilinae	Drosophila sp. 7	0	0	0	1	0
Drosophilidae	Drosophilinae	Drosophila sp. 8	0	0	0	1	0
Drosophilidae	Drosophilinae	Microdrosophila sp. 1	0	2	1	0	0
Drosophilidae	Drosophilinae	Microdrosophila sp. 2	0	2	0	0	0
Drosophilidae	Drosophilinae	Microdrosophila sp. 3	0	2	1	0	0
Drosophilidae	Drosophilinae	Microdrosophila sp. 4	0	0	1	0	0
Drosophilidae	Drosophilinae	Microdrosophila sp. 5	0	0	0	1	0
Drosophilidae	Drosophilinae	Microdrosophila spp n id (females)	2	2	0	2	0
Drosophilidae	Drosophilinae	Mycodrosophila sp. 1	0	1	0	0	0
Drosophilidae	Drosophilinae	Neotanygastrella aff. brasiliensis	3	1	3	2	0
Drosophilidae	Drosophilinae	Neotanygastrella aff. chymomyzoides	1	0	0	0	0
Drosophilidae	Drosophilinae	Zygothrica sp. 1	0	0	0	1	0
Drosophilidae	Drosophilinae	Zygothrica sp. 2	0	0	0	1	0
Drosophilidae	Drosophilinae	Genero não identicado	0	0	0	1	0
Drosophilidae	Steganinae	Amiota sp. 1	0	0	1	0	0
Drosophilidae	Steganinae	Leucophenga sp. 1	0	0	0	0	1
Drosophilidae	Steganinae	Pseudiastata pseudococcivora	0	1	0	0	1
Drosophilidae	Steganinae	Rhinoleucophenga sp. 1	1	0	0	0	0
Drosophilidae	Steganinae	Rhinoleucophenga sp. 2	0	1	0	0	0
Drosophilidae	Steganinae	Rhinoleucophenga sp. 4	0	0	1	3	0
Drosophilidae	Steganinae	Rhinoleucophenga sp. 3	2	0	2	0	0
Drosophilidae	Steganinae	Rhinoleucophenga sp. 5	0	0	1	2	0
Drosophilidae	Steganinae	Rhinoleucophenga sp. 6	0	0	0	1	1
Drosophilidae	Steganinae	Rhinoleucophenga sp. 7	0	0	0	5	7
Drosophilidae	Steganinae	Rhinoleucophenga sp. 8	0	0	0	1	0
Drosophilidae	Steganinae	Rhinoleucophenga sp. 9	0	0	0	1	0
Drosophilidae	Steganinae	Rhinoleucophenga sp. 10	0	0	0	0	1
Drosophilidae	Steganinae	Stegana sp. 1	1	0	0	0	0
Drosophilidae	Steganinae	Stegana sp. 2	0	0	1	0	0
Heleomyzidae	Rhinotorinae	Neorhinotora sp. 1	0	1	0	0	0
Inbiomyiidae		Inbiomyia sp. 1	2	0	0	0	0
Lauxaniidae	Lauxaniinae	Deceia spn 1	0	0	1	0	0
Lauxaniidae	Lauxaniinae	Marmarodeceia marmorata	0	0	0	1	0
Lauxaniidae	Lauxaniinae	Neoxangelina sp 1	4	7	11	2	0
Lauxaniidae	Lauxaniinae	Neoxangelina sp 2	3	2	0	3	0
Lauxaniidae	Lauxaniinae	Neoxangelina sp 3	0	1	0	0	0
Lauxaniidae	Lauxaniinae	Oncodometopus umbrosus	0	4	1	2	0
Lauxaniidae	Lauxaniinae	Oncodometopus sp 1	0	5	14	20	0
Lauxaniidae	Lauxaniinae	Oncodometopus sp 2	0	16	16	51	9
Lauxaniidae	Lauxaniinae	Oncodometopus sp 3	0	7	6	13	0
Lauxaniidae	Lauxaniinae	Oncodometopus sp 4	0	0	1	0	0
Lauxaniidae	Lauxaniinae	Oncodometopus sp 5	2	0	1	4	0
Lauxaniidae	Lauxaniinae	Oncodometopus sp 6	1	1	2	2	4
Lauxaniidae	Lauxaniinae	Oncodometopus sp 7	0	1	0	0	0
Lauxaniidae	Lauxaniinae	Physegenua? Sp 1	0	0	1	0	0
Lauxaniidae	Lauxaniinae	Physegenua? sp 2	0	0	4	0	0
Lauxaniidae	Lauxaniinae	Physoclypeus? sp 2	1	0	0	0	0
Lauxaniidae	Lauxaniinae	Poecilominettia brunneicosta?	0	0	0	0	1
Lauxaniidae	Lauxaniinae	Poecilominettia effosa group sp 1	0	0	3	0	0
Lauxaniidae	Lauxaniinae	Poecilominettia effosa group sp 2	0	0	1	0	0
Lauxaniidae	Lauxaniinae	Poecilominettia effosa group sp 3	0	1	0	0	0
Lauxaniidae	Lauxaniinae	Poecilominettia grata	0	0	0	3	0
Lauxaniidae	Lauxaniinae	Poecilominettia sp 3	0	1	2	1	1
Lauxaniidae	Lauxaniinae	Poecilominettia sp 4	0	0	0	2	0
Lauxaniidae	Lauxaniinae	Poecilominettia sp 5	0	0	0	2	0
Lauxaniidae	Lauxaniinae	Pseudogriphoneura sp 3	0	1	0	0	0
Lauxaniidae	Lauxaniinae	Siphonophysa sp 2	1	1	0	0	0
Lauxaniidae	Lauxaniinae	Siphonophysa sp 3	1	0	0	0	0
Lauxaniidae	Lauxaniinae	Scutominettia mallochi	1	0	0	0	0
Lauxaniidae	Lauxaniinae	Stenolauxania sp 1	1	1	0	0	0
Lauxaniidae	Lauxaniinae	Trivialia puella	0	0	0	1	0
Lauxaniidae	Lauxaniinae	Trivialia sp 4	1	1	0	0	0
Lauxaniidae	Lauxaniinae	Trivialia sp 5	0	1	0	0	0
Lauxaniidae	Lauxaniinae	Xenochaetina setitibia	0	0	1	0	0
Lauxaniidae	Lauxaniinae	Xenochaetina sp 1	0	0	0	1	0
Lauxaniidae	Lauxaniinae	Xenochaetina sp 2	0	1	2	1	0
Lauxaniidae	Lauxaniinae	Xenochaetina sp 6	0	0	1	0	0
Lauxaniidae	Lauxaniinae	Xenochaetina sp 7	2	1	1	2	1
Lauxaniidae	Lauxaniinae	Xenochaetina sp 8	0	0	1	2	0
Lauxaniidae	Lauxaniinae	Xenochaetina sp 9	0	0	1	0	0
Lauxaniidae	Lauxaniinae	Xenochaetina sp 10	1	0	0	0	0
Lauxaniidae	Lauxaniinae	Xenochaetina sp 11	1	1	0	2	0
Lauxaniidae	Lauxaniinae	Griphoneuromima sp 1	0	0	1	0	0
Lauxaniidae	Lauxaniinae	Meraina? sp 1	0	0	0	1	0
Lauxaniidae	Lauxaniinae	Undescribed genus A sp 1	0	0	1	0	0
Lauxaniidae	Lauxaniinae	Undescribed genus F sp 1	1	0	0	0	0
Lauxaniidae	Lauxaniinae	Undescribed genus nov sp 1	0	0	0	2	0
Micropezidae		Poecilotylus sp 1 R-group	1	0	0	0	0
Micropezidae		Poecilotylus sp 2_trifasciata group	1	0	1	1	0
Micropezidae		Poecilotylus sp 3	1	0	0	0	0
Micropezidae		Grallipeza unimaculata	2	3	1	1	0
Micropezidae		Cardiacephala sp 1	1	0	0	0	0
Micropezidae		Genus A hyaloptera (Hendel)	1	0	0	0	0
Micropezidae		Scipopus sp 1	0	2	1	0	0
Micropezidae		Genus cf Paragrallomyia sp 1	0	1	0	0	0
Micropezidae		Paragrallomyia sp 1	0	0	0	1	0
Milichiidae	Milichiinae	Milichia sp. 1	1	0	0	0	0
Milichiidae	Milichiinae	Milichia sp. 2	1	0	0	0	0
Milichiidae	Milichiinae	Milichiella sp. 1	1	0	0	1	0
Milichiidae	Milichiinae	Milichiella sp. 2	0	0	1	0	0
Milichiidae	Milichiinae	Milichiella sp. 3	0	0	0	1	0
Milichiidae	Milichiinae	Milichiella sp. 4	0	0	0	1	0
Milichiidae	Milichiinae	Pholeomyia sp. 1	1	0	0	0	0
Milichiidae	Milichiinae	Pholeomyia sp. 2	1	0	0	0	0
Milichiidae	Milichiinae	Pholeomyia sp. 3	1	0	0	0	0
Milichiidae	Milichiinae	Pholeomyia sp. 4	1	0	0	6	0
Milichiidae	Milichiinae	Pholeomyia sp. 5	0	1	0	0	0
Milichiidae	Milichiinae	Pholeomyia sp. 6	0	0	1	1	1
Milichiidae	Milichiinae	Pholeomyia sp. 7	0	0	2	1	0
Milichiidae	Milichiinae	Pholeomyia sp. 8	0	0	3	0	0
Milichiidae	Milichiinae	Pholeomyia sp. 9	0	0	0	0	0
Milichiidae	Milichiinae	Pholeomyia sp. 10	0	0	0	1	0
Milichiidae	Milichiinae	Pholeomyia sp. 11	0	0	0	1	0
Milichiidae	Milichiinae	Pholeomyia sp. 12	0	0	0	2	0
Milichiidae	Milichiinae	Pseudomilichia sp. 1	4	0	0	0	0
Milichiidae	Milichiinae	Desmometopa sp. 1	2	0	0	0	0
Milichiidae	Milichiinae	Desmometopa sp. 2	1	0	0	0	0
Milichiidae	Milichiinae	Leptometopa sp. 1	1	0	0	0	0
Milichiidae	Phyllomyzinae	Paramyia sp. 1	1	0	1	1	1
Milichiidae	Phyllomyzinae	Paramyia sp. 2	122	80	3	8	7
Milichiidae	Phyllomyzinae	Paramyia sp. 3	35	9	23	10	0
Milichiidae	Phyllomyzinae	Paramyia sp. 4	23	15	0	0	0
Milichiidae	Phyllomyzinae	Paramyia sp. 5	4	0	1	0	0
Milichiidae	Phyllomyzinae	Paramyia sp. 6	7	4	0	0	0
Milichiidae	Phyllomyzinae	Paramyia sp. 7	0	16	0	0	0
Milichiidae	Phyllomyzinae	Paramyia sp. 8	0	1	0	0	0
Milichiidae	Phyllomyzinae	Paramyia sp. 9	0	0	1	0	0
Milichiidae	Phyllomyzinae	Paramyia sp. 10	0	0	0	2	0
Milichiidae	Phyllomyzinae	Paramyia sp. 11	0	0	0	6	0
Milichiidae	Phyllomyzinae	Paramyia sp. 12	0	0	0	10	0
Milichiidae	Phyllomyzinae	Paramyia sp. 13	0	0	0	0	1
Milichiidae	Phyllomyzinae	Phyllomyza sp. 1	0	0	0	3	0
Milichiidae	Phyllomyzinae	Phyllomyza sp. 2	0	0	0	1	0
Neriidae		Glyphidops sp. 1	0	1	2	0	0
Neriidae		Glyphidops sp. 2	0	0	1	0	0
Odiniidae	Traginopinae	Helgreelia sp. 1	0	0	0	1	0
Odiniidae	Traginopinae	Inpauema sp. 1	0	0	0	1	0
Odiniidae	Odiniinae	Odinia sp. 1	0	1	1	4	0
Odiniidae	Odiniinae	Odinia sp. 2	0	1	3	1	0
Odiniidae	Odiniinae	Odinia sp. 3	0	0	0	1	1
Odiniidae	Odiniinae	Odinia sp. 4	0	0	1	1	0
Odiniidae	Odiniinae	Odinia sp. 5	2	0	0	0	0
Odiniidae	Traginopinae	Schildomyia sp. 1	0	0	0	0	1
Pseudopomyzidae		Rhinopomyzella sp. 1	0	0	0	0	1
Sepsidae	Sepsinae	Archisepsis sp	0	1	0	0	0
Sepsidae	Sepsinae	Microsepsis armillata	1	0	0	0	0
Sepsidae	Sepsinae	Archisepsis excavata	4	0	0	0	0
Anthomyiidae		Phaonantho sp	0	1	0	0	0
Muscidae	Cyrtoneurinae	Cyrtoneuropsis conspersa (Stein)	22	14	2	8	0
Muscidae	Cyrtoneurinae	Cyrtoneuropsis multomaculata (Stein)	0	1	0	5	1
Muscidae	Cyrtoneurinae	Cyrtoneuropsis armipes (Snyder)	0	0	0	1	0
Muscidae	Cyrtoneurinae	Cyrtoneuropsis sp 1	0	0	1	0	0
Muscidae	Cyrtoneurinae	Cyrtoneuropsis sp 2	0	0	1	0	1
Muscidae	Cyrtoneurinae	Cyrtoneuropsis sp 3	0	0	0	0	1
Muscidae	Cyrtoneurinae	Cyrtoneuropsis sp 4	0	0	0	1	0
Muscidae	Cyrtoneurinae	Cyrtoneuropsis sp 5	0	0	1	0	0
Muscidae	Cyrtoneurinae	Cyrtoneuropsis sp 6	0	0	0	1	0
Muscidae	Cyrtoneurinae	Cyrtoneuropsis sp 7	0	0	1	0	0
Muscidae	Cyrtoneurinae	Cyrtoneuropsis sp 8	0	0	0	1	0
Muscidae	Cyrtoneurinae	Cyrtoneuropsis sp 9	0	0	1	1	0
Muscidae	Cyrtoneurinae	Cyrtoneuropsis sp 10	0	0	1	0	0
Muscidae	Cyrtoneurinae	Cyrtoneurina sp 1 *	0	0	0	0	1
Muscidae	Cyrtoneurinae	Cyrtoneurina sp 2 *	0	0	0	0	1
Muscidae	Coenosiinae	Neodexiopsis neoaustralis Snyder	0	0	0	1	3
Muscidae	Coenosiinae	Neodexiopsis emmesa Malloch	6	0	1	9	16
Muscidae	Coenosiinae	Neodexiopsis sp 1	1	0	0	0	0
Muscidae	Coenosiinae	Neodexiopsis sp 2	2	0	0	0	0
Muscidae	Coenosiinae	Neodexiopsis sp 3	0	1	0	0	0
Muscidae	Coenosiinae	Neodexiopsis sp 4	0	0	1	0	0
Muscidae	Coenosiinae	Neodexiopsis sp 5	0	1	0	0	0
Muscidae	Coenosiinae	Neodexiopsis sp 6	0	0	0	0	1
Muscidae	Coenosiinae	Neodexiopsis sp 7	0	0	0	0	1
Muscidae	Coenosiinae	Neodexiopsis sp 8	0	0	0	0	1
Muscidae	Coenosiinae	Neodexiopsis sp 9	0	0	0	1	0
Muscidae	Coenosiinae	Coenosia sp 1	3	0	0	0	0
Muscidae	Coenosiinae	Coenosia sp 2	0	0	0	2	0
Muscidae	Coenosiinae	Coenosia sp 3	1	0	0	0	0
Muscidae	Coenosiinae	Coenosia sp 4	0	0	0	1	1
Muscidae	Coenosiinae	Coenosia sp 5	1	0	0	0	0
Muscidae	Coenosiinae	Coenosia sp 6	0	0	0	1	0
Muscidae	Coenosiinae	Coenosia sp 7	0	0	0	0	1
Muscidae	Coenosiinae	Lispe serotina Wulp	0	0	0	0	2
Muscidae	Coenosiinae	Bithoracochaeta sp *	3	0	0	0	0
Muscidae	Muscinae	Stomopogon sp	0	1	0	0	0
Muscidae	Muscinae	Polietina sp *	0	0	0	1	0
Muscidae	Muscinae	Morellia sp	0	1	0	0	0
Muscidae	Azeliinae	Philornis sp	0	1	0	0	0
Muscidae	Phaoninae	Phaonia sp	0	1	0	0	0
Muscidae	Phaoninae	Dolichophaonia sp *	0	1	0	0	0
Rhinophoridae		Bezzimyia sp. 1	1	0	0	0	0
Rhinophoridae		Undescribed genus sp. 1	1	0	0	0	0
Sarcophagidae	Sarcophaginae	Blaesoxipha (Tephromyia) rimosa	0	0	0	0	1
Sarcophagidae	Sarcophaginae	Blaesoxipha (Tephromyia) tingomaria	0	0	0	0	3
Sarcophagidae	Sarcophaginae	Dexosarcophaga globulosa	0	0	0	1	0
Sarcophagidae	Sarcophaginae	Dexosarcophaga transita	3	0	0	0	22
Sarcophagidae	Sarcophaginae	Emdenimyia korytkowskii	0	0	1	0	0
Sarcophagidae	Sarcophaginae	Emdenimyia limai	0	0	0	0	1
Sarcophagidae	Sarcophaginae	Lepidodexia (Harpagopyga) albida	1	0	0	0	0
Sarcophagidae	Sarcophaginae	Lepidodexia (Notochaetisca) sp.n. 1	0	1	0	0	0
Sarcophagidae	Sarcophaginae	Lepidodexia (Notochaetisca) sp.n. 2	0	0	0	0	1
Sarcophagidae	Sarcophaginae	Orosarcophaga sp.n. 1	0	0	0	1	0
Sarcophagidae	Sarcophaginae	Retrocitomyia retrocita	0	0	0	1	0
Sarcophagidae	Sarcophaginae	Peckia (Sarcodexia) lambens	0	0	0	0	2
Tachinidae	Dexiinae	Campylocheta sp. 1	0	14	4	8	1
Tachinidae	Dexiinae	Periscepsia sp. 1	0	0	1	0	0
Tachinidae	Dexiinae	Periscepsia sp. 2	0	0	0	0	1
Tachinidae	Dexiinae	Zelia magna	1	0	0	0	0
Tachinidae	Dexiinae	Zelia sp. 1	0	0	1	0	0
Tachinidae	Dexiinae	Neozelia alini	0	0	1	0	0
Tachinidae	Dexiinae	Billaea sp. 1	0	1	0	0	0
Tachinidae	Dexiinae	Billaea sp. 2	0	0	1	0	0
Tachinidae	Dexiinae	Cordyligaster petiolata	0	3	3	0	0
Tachinidae	Dexiinae	Euoestrophasia aperta	0	0	0	0	3
Tachinidae	Dexiinae	Cenosoma sp. 1	0	0	0	0	1
Tachinidae	Phasiinae	Xanthomelanopsis sp. 1	1	0	0	0	0
Tachinidae	Phasiinae	Euacaulona sp. 1	0	1	0	0	0
Tachinidae	Phasiinae	Unknown genus sp. 1	0	1	0	0	0
Tachinidae	Phasiinae	Strongygaster sp. 1	0	0	0	0	1
Tachinidae	Exoristinae	Acemya sp. 1	0	1	1	0	0
Tachinidae	Exoristinae	cf. Ceracia sp. 1	0	0	0	0	1
Tachinidae	Exoristinae	Anisia sp. 1	0	1	0	0	0
Tachinidae	Exoristinae	cf. Anisia sp. 1	0	0	2	0	25
Tachinidae	Exoristinae	cf. Anoxynops sp. 1	0	1	0	0	0
Tachinidae	Exoristinae	Borgmeiermyia cf. rozeni	18	23	0	1	0
Tachinidae	Exoristinae	Borgmeiermyia cf. brasiliana	0	3	7	0	0
Tachinidae	Exoristinae	Borgmeiermyia sp. 1	3	0	1	0	0
Tachinidae	Exoristinae	Borgmeiermyia sp. 2	7	0	0	0	0
Tachinidae	Exoristinae	Calodexia sp. 1	2	2	0	0	0
Tachinidae	Exoristinae	Chaetostigmoptera sp. 1	0	2	2	0	0
Tachinidae	Exoristinae	Blondelia sp. 1	0	0	1	0	1
Tachinidae	Exoristinae	Unknown genus sp. 1	0	0	1	0	0
Tachinidae	Exoristinae	Celatoria sp. 1	0	1	4	0	0
Tachinidae	Exoristinae	Celatoria sp. 2	0	2	7	6	16
Tachinidae	Exoristinae	Calolydella sp. 1	0	1	0	0	0
Tachinidae	Exoristinae	Calolydella sp. 2	0	0	0	8	0
Tachinidae	Exoristinae	cf. Eribella sp. 1	0	0	0	0	2
Tachinidae	Exoristinae	Erythromelana sp. 1	0	4	0	0	0
Tachinidae	Exoristinae	Erythromelana sp. 2	0	4	0	0	0
Tachinidae	Exoristinae	Erythromelana sp. 3	0	1	1	0	0
Tachinidae	Exoristinae	Erythromelana sp. 4	0	7	0	0	0
Tachinidae	Exoristinae	cf. Erythromelana sp. 1	0	0	0	1	0
Tachinidae	Exoristinae	aff. Erythromelana sp. 1	0	0	1	0	0
Tachinidae	Exoristinae	aff. Erythromelana sp. 2	0	0	0	0	1
Tachinidae	Exoristinae	aff. Erythromelana sp. 3	0	0	0	0	1
Tachinidae	Exoristinae	Eucelatoria sp. 1	0	1	0	0	0
Tachinidae	Exoristinae	Eucelatoria sp. 2	0	0	1	0	0
Tachinidae	Exoristinae	Eucelatoria sp. 3	0	0	1	0	0
Tachinidae	Exoristinae	Eucelatoria sp. 4	0	4	0	2	0
Tachinidae	Exoristinae	Eucelatoria sp. 5	0	0	0	1	0
Tachinidae	Exoristinae	Eucelatoria sp. 6	0	0	0	0	1
Tachinidae	Exoristinae	Eucelatoria sp. 7	0	0	1	0	0
Tachinidae	Exoristinae	Eucelatoria sp. 8	0	0	0	0	1
Tachinidae	Exoristinae	cf. Eucelatoria sp. 1	0	0	2	0	0
Tachinidae	Exoristinae	aff. Eucelatoria sp. 1	0	0	0	0	2
Tachinidae	Exoristinae	aff. Eucelatoria sp. 2	0	0	1	0	0
Tachinidae	Exoristinae	aff. Eucelatoria sp. 3	0	0	1	0	0
Tachinidae	Exoristinae	Euhalidaya sp. 1	0	0	2	0	0
Tachinidae	Exoristinae	Euhalidaya sp. 2	0	3	0	0	0
Tachinidae	Exoristinae	Euhalidaya sp. 3	0	0	0	0	1
Tachinidae	Exoristinae	Euhalidaya sp. 4	0	1	0	0	0
Tachinidae	Exoristinae	aff. Euhalidaya sp. 1	0	0	0	2	0
Tachinidae	Exoristinae	cf. Ischyrophaga sp. 1	0	2	0	0	0
Tachinidae	Exoristinae	cf. Ischyrophaga sp. 2	0	0	4	0	0
Tachinidae	Exoristinae	cf. Ischyrophaga sp. 3	0	0	1	0	0
Tachinidae	Exoristinae	aff. Ischyrophaga sp. 1	0	0	1	0	0
Tachinidae	Exoristinae	cf. Italispidea sp. 1	0	9	0	0	0
Tachinidae	Exoristinae	cf. Italispidea sp. 2	0	0	2	1	1
Tachinidae	Exoristinae	cf. Italispidea sp. 3	0	2	0	0	0
Tachinidae	Exoristinae	cf. Italispidea sp. 4	0	1	0	0	0
Tachinidae	Exoristinae	cf. Italispidea sp. 5	0	1	2	2	0
Tachinidae	Exoristinae	aff. Italispidea sp. 1	0	0	0	0	1
Tachinidae	Exoristinae	Lixophaga sp. 1	0	1	0	0	0
Tachinidae	Exoristinae	cf. Lixophaga sp. 1	0	1	0	0	0
Tachinidae	Exoristinae	Lydinolydella sp. 1	0	1	0	0	0
Tachinidae	Exoristinae	Lydinolydella sp. 2	0	1	0	0	0
Tachinidae	Exoristinae	Myiopharus sp. 1	0	0	0	0	2
Tachinidae	Exoristinae	Myiopharus sp. 2	0	0	3	0	0
Tachinidae	Exoristinae	aff. Myiopharus sp. 1	0	0	0	0	1
Tachinidae	Exoristinae	aff. Ophirion sp. 1	0	0	0	1	0
Tachinidae	Exoristinae	Phasmophaga sp. 1	0	0	0	0	3
Tachinidae	Exoristinae	Phyllophilopsis sp. 1	0	0	2	0	1
Tachinidae	Exoristinae	Phyllophilopsis sp. 2	0	0	0	0	1
Tachinidae	Exoristinae	Phyllophilopsis sp. 3	0	0	0	1	0
Tachinidae	Exoristinae	Phyllophilopsis sp. 4	0	0	0	0	2
Tachinidae	Exoristinae	Phyllophilopsis sp. 5	0	0	0	0	2
Tachinidae	Exoristinae	Sphaerina sp. 1	0	0	0	0	1
Tachinidae	Exoristinae	cf. Sphaerina sp. 1	0	1	0	0	0
Tachinidae	Exoristinae	aff. Sphaerina sp. 1	0	1	0	0	0
Tachinidae	Exoristinae	Thelyoxynops sp. 1	0	0	0	0	2
Tachinidae	Exoristinae	aff. Thelyoxynops sp. 1	0	0	1	0	0
Tachinidae	Exoristinae	Trigonospila sp. 1	0	0	1	0	10
Tachinidae	Exoristinae	cf. Trigonospila sp. 1	0	1	0	0	1
Tachinidae	Exoristinae	Vibrissina sp. 1	0	0	0	0	1
Tachinidae	Exoristinae	Vibrissina sp. 2	0	0	0	0	2
Tachinidae	Exoristinae	Zaira sp. 1	0	1	0	0	0
Tachinidae	Exoristinae	Carcelia sp. 1	0	2	0	0	0
Tachinidae	Exoristinae	Carcelia sp. 2	1	0	0	0	0
Tachinidae	Exoristinae	Drino sp. 1	0	0	2	0	2
Tachinidae	Exoristinae	Lespesia sp. 1	0	3	0	0	0
Tachinidae	Exoristinae	Lespesia sp. 2	0	0	2	0	0
Tachinidae	Exoristinae	Lespesia sp. 3	0	0	0	2	5
Tachinidae	Exoristinae	Siphosturmia sp. 1	0	2	0	0	0
Tachinidae	Exoristinae	Argyrophylax sp. 1	0	0	1	0	0
Tachinidae	Exoristinae	Atacta sp. 1	0	0	0	0	1
Tachinidae	Exoristinae	Atactosturmia sp. 1	0	0	0	5	8
Tachinidae	Exoristinae	Belvosia sp. 1	0	0	0	0	6
Tachinidae	Exoristinae	Chrysoexorista sp. 1	1	0	1	0	0
Tachinidae	Exoristinae	Distichona sp. 1	0	0	0	0	10
Tachinidae	Exoristinae	Hyphantrophaga sp. 1	0	5	1	0	0
Tachinidae	Exoristinae	Hyphantrophaga sp. 2	0	1	0	0	0
Tachinidae	Exoristinae	Houghia sp. 1	1	1	0	0	0
Tachinidae	Exoristinae	Patelloa sp. 1	0	0	0	7	2
Tachinidae	Exoristinae	Patelloa sp. 2	0	0	0	0	1
Tachinidae	Exoristinae	Pseudochaeta sp. 1	0	1	0	0	0
Tachinidae	Exoristinae	Masiphya sp. 1	0	0	1	0	0
Tachinidae	Exoristinae	Triodontopyga sp. 1	1	0	0	0	0
Tachinidae	Exoristinae	Winthemia sp. 1	0	1	3	2	2
Tachinidae	Exoristinae	Winthemia sp. 2	0	1	1	1	0
Tachinidae	Exoristinae	Austrophorocera sp. 1	0	1	0	0	4
Tachinidae	Exoristinae	cf. Chetogena sp. 1	0	0	0	0	2
Tachinidae	Exoristinae	Chetogena sp. 1	0	0	0	0	1
Tachinidae	Exoristinae	Chetogena sp. 2	0	0	0	0	1
Tachinidae	Exoristinae	cf. Pelecotheca sp. 1	0	0	0	0	4
Tachinidae	Exoristinae	cf. Pelecotheca sp. 2	0	0	4	0	0
Tachinidae	Exoristinae	Cerotachina cf. albula	0	0	0	0	2
Tachinidae	Exoristinae	Cryptocladocera cf. prodigiosa	0	2	0	0	0
Tachinidae	Exoristinae	Acemya sp. 2	0	0	0	0	1
Tachinidae	Tachininae	Phytomyptera sp. 1	0	0	0	0	36
Tachinidae	Tachininae	Phytomyptera sp. 2	0	0	0	2	6
Tachinidae	Tachininae	Phytomyptera sp. 3	0	0	1	6	4
Tachinidae	Tachininae	Phytomyptera sp. 4	0	0	0	1	1
Tachinidae	Tachininae	Phytomyptera sp. 5	0	0	1	54	23
Tachinidae	Tachininae	Phytomyptera sp. 6	0	0	2	3	28
Tachinidae	Tachininae	Phytomyptera sp. 7	0	1	1	1	5
Tachinidae	Tachininae	Phytomyptera sp. 8	1	0	34	6	5
Tachinidae	Tachininae	Icelia sp. 1	0	1	0	0	0
Tachinidae	Tachininae	Ginglymia sp. 1	0	0	4	0	0
Tachinidae	Tachininae	Leskia sp. 1	2	2	1	0	0
Tachinidae	Tachininae	Leskia sp. 2	0	1	1	0	0
Tachinidae	Tachininae	Leskia sp. 3	1	1	0	0	1
Tachinidae	Tachininae	Stomatodexia sp. 1	0	1	0	0	0
Tachinidae	Tachininae	Uruleskia aff. aurescens	0	8	0	1	0
Tachinidae	Tachininae	Uruleskia infima	0	8	1	0	0
Tachinidae	Tachininae	Leskiini gen. nov.	0	2	0	2	0
Tachinidae	Tachininae	Acronacantha sp. 1	0	0	1	0	0
Tachinidae	Tachininae	Cholomyia acromion	0	0	1	0	0
Tachinidae	Tachininae	Cholomyia sp. 1	0	0	0	0	1
Tachinidae	Tachininae	Unknown genus sp. 1	0	1	0	0	0
Tachinidae	Tachininae	Hypotachina sp. 1	0	1	0	0	0
Tachinidae	Tachininae	Xanthophyto sp. 1	0	2	1	1	9
Tachinidae	Tachininae	Xanthophyto sp. 2	0	1	0	0	0
Tachinidae	Tachininae	Xanthophyto sp. 3	0	0	0	1	0
Tachinidae	Tachininae	Xanthophyto sp. 4	0	1	1	2	3
Tachinidae	Tachininae	Xanthophyto sp. 5	0	2	0	0	0
Tachinidae	Tachininae	Ceromya sp. 1	0	1	1	0	0
Tachinidae	Tachininae	Ceromya sp. 2	0	6	1	0	1
Tachinidae	Tachininae	Ceromya sp. 3	0	7	2	3	0
Tachinidae	Tachininae	Ceromya sp. 4	0	13	1	0	0
Tachinidae	Tachininae	Ceromya sp. 5	0	0	3	0	0
Tachinidae	Tachininae	Pseudosiphona sp. 1	3	3	0	0	0
Tachinidae	Tachininae	Pseudosiphona sp. 2	0	9	4	5	0
Tachinidae	Tachininae	Pseudosiphona sp. 3	1	14	7	1	0
Tachinidae	Tachininae	Pseudosiphona sp. 4	0	4	0	0	0
Tachinidae	Tachininae	Pseudosiphona sp. 5	3	0	0	0	0
Tachinidae	Tachininae	Siphona sp. 1	0	1	3	0	0
Tachinidae	Tachininae	Siphona sp. 2	2	0	0	0	0
Tachinidae	Tachininae	Archytas sp. 1	0	0	1	0	0
Tachinidae	Tachininae	Exopalpus sp. 1	0	3	2	0	0
Tachinidae	Tachininae	Phosocephala metallica	0	1	2	0	1
			3634	1536	866	1812	961
