# Supplementary material for: Vertical stratification of Diptera abundance and species richness in an Amazonian tropical forest
Source: Research Square preprint supplement (doi:10.21203/rs.3.rs-430012/v1), 2021-04-22
Supplement: Supplementary file 3 [file df25670a0d92cf0f8e05100d.xlsx]

## Sheet: Plan1
Supplementary Material. Table III. Number of species of fly families sampled at each of the ZF2 biological reserve tower levels. Patterns only for family with 10 or more specimens.
	Number of species						% at each level
Diptera family	0 m	8 m	16 m	24 m	32 m	TOTAL	0 m	8 m	16 m	24 m	32 m	Peaks	Peak levels
Tachinidae	17	73	66	32	61	166	0.10241	0.439759	0.39759	0.192771	0.36747	2	8/32
Mycetophilidae*	79	25	20	20	9	101	0.782178	0.247525	0.19802	0.19802	0.0891089	1	0
Dolichopodidae	30	22	42	34	28	71	0.422535	0.309859	0.591549	0.478873	0.394366	2	0/16+24
Limoniidae	33	17	12	23	9	60	0.55	0.283333	0.2	0.383333	0.15	2	0/16+24
Drosophilidae	18	16	14	19	6	51	0.352941	0.313725	0.27451	0.372549	0.117647	2	0/16+24
Phoridae**	19	27	19	22	16	46	0.413043	0.586957	0.413043	0.478261	0.347826	2	8/24
Lauxaniidae	14	19	22	21	5	46	0.304348	0.413043	0.478261	0.456522	0.108696	1	16+24
Muscidae	8	9	9	14	13	41	0.195122	0.219512	0.219512	0.341463	0.317073	1	16+24
Milichiidae	17	7	9	17	4	37	0.459459	0.189189	0.243243	0.459459	0.108108	2	0/16+24
Stratiomyidae	19	7	9	2	1	32	0.59375	0.21875	0.28125	0.0625	0.03125	2	0/16+24
Chloropidae	9	13	4	7	1	29	0.310345	0.448276	0.137931	0.241379	0.0344828	2	8/24
Empididae	15	11	6	7	3	24	0.625	0.458333	0.25	0.291667	0.125	2	0/16+24
Tabanidae	12	10	4	5	4	19	0.631579	0.526316	0.210526	0.263158	0.210526	2	0/16+24
Tipulidae	10	5	3	5	5	18	0.555556	0.277778	0.166667	0.277778	0.277778	2	0/16+24
Clusiidae	1	7	0	7	1	16	0.0625	0.4375	0	0.4375	0.0625	2	8/24
Pipunculidae	2	4	3	6	0	14	0.142857	0.285714	0.214286	0.428571	0	2	8/24
Syrphidae	0	5	6	6	1	14	0	0.357143	0.428571	0.428571	0.0714286	1	16+24
Sarcophagidae	2	1	1	3	6	12	0.166667	0.0833333	0.0833333	0.25	0.5	2	0/32
Micropezidae	6	3	3	3	0	10	0.6	0.3	0.3	0.3	0	1	0
Odiniidae	1	2	3	6	2	8	0.125	0.25	0.375	0.75	0.25	1	16+24
Scatopsidae	4	5	1	1	0	7	0.571429	0.714286	0.142857	0.142857	0	1	8
Anisopodidae	0	5	3	1	0	5	0	1	0.6	0.2	0
Lygistorrhinidae	1	3	1	0	0	4	0.25	0.75	0.25	0	0
Conopidae	1	1	0	1	0	3	0.333333	0.333333	0	0.333333	0
Rhagionidae	2	0	0	1	0	3	0.666667	0	0	0.333333	0
Sepsidae	2	1	0	0	0	3	0.666667	0.333333	0	0	0
Rhinophoridae	2	0	0	0	0	2	1	0	0	0	0
Neriidae	0	1	2	0	0	2	0	0.5	1	0	0
Bibionidae	1	0	1	0	0	2	0.5	0	0.5	0	0
Platypezidae	0	0	0	1	0	1	0	0	0	1	0
Anthomyiidae	0	1	0	0	0	1	0	1	0	0	0
Heleomyzidae	0	1	0	0	0	1	0	1	0	0	0
Inbiomyiidae	1	0	0	0	0	1	1	0	0	0	0
Pseudopomyzidae	0	0	0	0	1	1	0	0	0	0	1
Aulacigastridae	1	0	0	0	0	1	1	0	0	0	0
Bombyliidae	0	1	0	1	0	1	0	1	0	1	0
Therevidae	0	0	0	1	0	1	0	0	0	1	0
Diadocidiidae	1	0	0	0	0	1	1	0	0	0	0
Ditomyiidae	1	0	0	0	0	1	1	0	0	0	0
TOTAL	312	229	197	234	115	856	0.364486	0.267523	0.23014	0.273364	0.134346
* The mycetophilid genus Manota identified only to genus and counted as one species
** Identified to genera, each genus counted as one species
